# Supplementary material
Source: PubMed Central journal article supplement (PMC1569196)
Supplement: pnas_0601107103_2.pdf [file pnas_0601107103_2.pdf]

**Table 2. Expression profiles of olfactory receptors in the proboscis of *An. gambiae* (AgORs)**

| Target AgOR gene      | Detection of AgOR expression by RT-PCR in whole proboscis tissue (4 experiments, unless indicated otherwise) |          | Detection of AgOR expression by single sensillum RT-PCR in S1 sensillum (10 experiments) |
|-----------------------|--------------------------------------------------------------------------------------------------------------|----------|------------------------------------------------------------------------------------------|
|                       | Male                                                                                                         | Female   |                                                                                          |
| <i>AgOR1</i>          | 0                                                                                                            | 0        | ND                                                                                       |
| <i>AgOR2</i>          | 0                                                                                                            | 0        | ND                                                                                       |
| <i>AgOR3</i>          | 4                                                                                                            | 4        | 1                                                                                        |
| <i>AgOR4</i>          | 4                                                                                                            | 4        | 0                                                                                        |
| <i>AgOR5</i>          | ND                                                                                                           | ND       | ND                                                                                       |
| <b><i>AgOR6</i></b>   | <b>4</b>                                                                                                     | <b>4</b> | <b>6←</b>                                                                                |
| <i>AgOR7</i>          | 4                                                                                                            | 4        | 10                                                                                       |
| <i>AgOR8</i>          | 0                                                                                                            | 0        | ND                                                                                       |
| <i>AgOR9</i>          | 0                                                                                                            | 0        | ND                                                                                       |
| <i>AgOR10</i>         | 0                                                                                                            | 1        | ND                                                                                       |
| <i>AgOR11</i>         | 1                                                                                                            | 0        | ND                                                                                       |
| <i>AgOR12</i>         | 4                                                                                                            | 4        | 2                                                                                        |
| <i>AgOR13</i>         | 4                                                                                                            | 4        | 0                                                                                        |
| <i>AgOR14</i>         | 3                                                                                                            | 3        | 0                                                                                        |
| <i>AgOR15</i>         | 4                                                                                                            | 4        | 1                                                                                        |
| <i>AgOR16*</i>        | 0                                                                                                            | 3        | 0                                                                                        |
| <i>AgOR17</i>         | 2                                                                                                            | 4        | 0                                                                                        |
| <i>AgOR18</i>         | 4                                                                                                            | 4        | 2                                                                                        |
| <i>AgOR19</i>         | 4                                                                                                            | 4        | 1                                                                                        |
| <i>AgOR20</i>         | 4                                                                                                            | 4        | 0                                                                                        |
| <i>AgOR21</i>         | 4                                                                                                            | 3        | 0                                                                                        |
| <i>AgOR22</i>         | 0                                                                                                            | 0        | ND                                                                                       |
| <i>AgOR23</i>         | 0                                                                                                            | 1        | ND                                                                                       |
| <i>AgOR24*</i>        | 0                                                                                                            | 2        | ND                                                                                       |
| <i>AgOR25</i>         | 1                                                                                                            | 1        | ND                                                                                       |
| <i>AgOR26</i>         | 0                                                                                                            | 0        | ND                                                                                       |
| <i>AgOR27</i>         | 0                                                                                                            | 0        | ND                                                                                       |
| <b><i>AgOR28*</i></b> | <b>0</b>                                                                                                     | <b>3</b> | <b>1</b>                                                                                 |
| <i>AgOR29</i>         | ND                                                                                                           | ND       | ND                                                                                       |
| <i>AgOR30</i>         | 0                                                                                                            | 1        | ND                                                                                       |
| <i>AgOR31</i>         | 0                                                                                                            | 0        | ND                                                                                       |
| <i>AgOR32</i>         | 0                                                                                                            | 0        | 0                                                                                        |
| <i>AgOR33</i>         | 0                                                                                                            | 0        | ND                                                                                       |
| <i>AgOR34</i>         | 0                                                                                                            | 0        | ND                                                                                       |
| <i>AgOR35</i>         | 0                                                                                                            | 0        | ND                                                                                       |
| <i>AgOR36</i>         | 0                                                                                                            | 0        | ND                                                                                       |
| <i>AgOR37</i>         | 0                                                                                                            | 0        | ND                                                                                       |
| <i>AgOR38</i>         | 0                                                                                                            | 0        | ND                                                                                       |
| <b><i>AgOR39*</i></b> | <b>1</b>                                                                                                     | <b>3</b> | <b>0</b>                                                                                 |
| <i>AgOR40</i>         | 0                                                                                                            | 0        | ND                                                                                       |
| <i>AgOR41</i>         | 0                                                                                                            | 0        | ND                                                                                       |
| <i>AgOR42</i>         | 0                                                                                                            | 0        | ND                                                                                       |
| <i>AgOR43</i>         | 0                                                                                                            | 0        | ND                                                                                       |
| <i>AgOR44</i>         | 0                                                                                                            | 1        | ND                                                                                       |

| Target AgOR gene | Detection of AgOR expression by RT-PCR in whole proboscis tissue (4 experiments, unless indicated otherwise) |                      | Detection of AgOR expression by single sensillum RT-PCR in S1 sensillum (10 experiments) |
|------------------|--------------------------------------------------------------------------------------------------------------|----------------------|------------------------------------------------------------------------------------------|
|                  | Male                                                                                                         | Female               |                                                                                          |
| <i>AgOR45</i>    | 0                                                                                                            | 0                    | ND                                                                                       |
| <i>AgOR46</i>    | 0                                                                                                            | 0                    | ND                                                                                       |
| <i>AgOR47</i>    | 0                                                                                                            | 0                    | ND                                                                                       |
| <i>AgOR48</i>    | 0                                                                                                            | 0                    | ND                                                                                       |
| <i>AgOR49</i>    | 0                                                                                                            | 0                    | ND                                                                                       |
| <i>AgOR50</i>    | 0                                                                                                            | 0                    | ND                                                                                       |
| <i>AgOR51</i>    | 0                                                                                                            | 0                    | ND                                                                                       |
| <i>AgOR52</i>    | 0                                                                                                            | 0                    | ND                                                                                       |
| <i>AgOR53</i>    | 4                                                                                                            | 3                    | 3                                                                                        |
| <i>AgOR54</i>    | 0                                                                                                            | 0                    | ND                                                                                       |
| <i>AgOR55</i>    | 3                                                                                                            | 4                    | 1                                                                                        |
| <i>AgOR56/57</i> | 2                                                                                                            | 3                    | 0                                                                                        |
| <i>AgOR58</i>    | 0                                                                                                            | 0                    | ND                                                                                       |
| <i>AgOR59</i>    | 0                                                                                                            | 1                    | ND                                                                                       |
| <i>AgOR60</i>    | 0 (of 3 experiments)                                                                                         | 0 (of 3 experiments) | ND                                                                                       |
| <i>AgOR61</i>    | 0                                                                                                            | 0                    | ND                                                                                       |
| <i>AgOR62*</i>   | 1                                                                                                            | 4                    | 1                                                                                        |
| <i>AgOR63</i>    | 0                                                                                                            | 0                    | ND                                                                                       |
| <i>AgOR64</i>    | 0                                                                                                            | 0                    | ND                                                                                       |
| <i>AgOR65</i>    | 0                                                                                                            | 1                    | ND                                                                                       |
| <i>AgOR66/67</i> | 0 (of 3 experiments)                                                                                         | 2                    | ND                                                                                       |
| <i>AgOR68*</i>   | 0 (of 3 experiments)                                                                                         | 2                    | ND                                                                                       |
| <i>AgOR69</i>    | 0                                                                                                            | 0                    | ND                                                                                       |
| <i>AgOR70*</i>   | 0                                                                                                            | 3                    | 1                                                                                        |
| <i>AgOR71*</i>   | 0                                                                                                            | 2                    | ND                                                                                       |
| <i>AgOR72</i>    | 0 (of 3 experiments)                                                                                         | 0 (of 3 experiments) | ND                                                                                       |
| <i>AgOR73*</i>   | 0 (of 3 experiments)                                                                                         | 2                    | ND                                                                                       |
| <i>AgOR74</i>    | 0 (of 3 experiments)                                                                                         | 0                    | ND                                                                                       |
| <i>AgOR75/76</i> | 0 (of 3 experiments)                                                                                         | 1                    | ND                                                                                       |
| <i>AgOR77</i>    | 0                                                                                                            | 0                    | ND                                                                                       |
| <i>AgOR78/79</i> | 0 (of 3 experiments)                                                                                         | 0                    | ND                                                                                       |

16 AgORs were reproducibly detected in the whole-proboscis tissue from male and female mosquitoes (shaded rows). Expression of nine AgORs (shaded rows with asterisks) was reproducibly detected exclusively in female mosquitoes. AgORs 56 and 57 are 95.6% identical in their predicted cDNA sequence and could not be distinguished in the amplified region. Expression profiles of olfactory receptors (AgORs) from the S1 sensillum on the labellum of *An. gambiae* were detected by single sensillum RT-PCR. In all 10 preparations of the single S1 sensillum, AgOR7 mRNA expression was detected. AgOR6 was detected in 6 of 10 S1 preparations (indicated by boldface type), whereas AgOR53 was detected in 3 of 10 S1 preparations. AgOR12 and 18 were detected twice and another 7 AgORs were detected only once in 10 S1 preparations. ND, not determined.
